# Supplementary material
Source: Springer Nature journal article supplement (https://www.springerprofessional.de/resource/supplementary/40493_2014_8_MOESM8_ESM.pdf/11899610)

Detection Points vs. No. of Vehicles

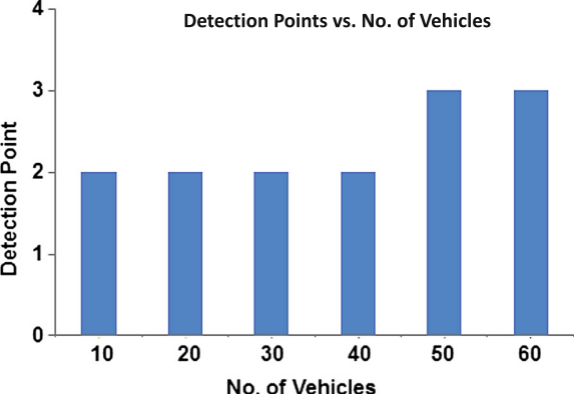

Supplement: MOESM8 [file 11899610]
